# Supplementary material
Source: publisher figshare collection journal article supplement (https://karger.figshare.com/articles/dataset/_/8976602)
Supplement: Supplementary file 3 [file 1]

## FORM OF CONSENT (For Adult)
