# Supplementary material
Source: publisher figshare collection journal article supplement (https://karger.figshare.com/articles/dataset/_/8976602)
Supplement: Supplementary file 4 [file 1]

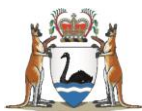

Name  
Street No. Street Name.  
Suburb  
State, Postcode

Dear **Name,**

Thank you for agreeing to participate in the Community Forum exploring the issue of whether it is acceptable to screen children for the condition Familial Hypercholesterolaemia (FH).

The forum is being held at the Bendat Community Centre on **Saturday 27<sup>th</sup> February 2016**. The venue is located near Lake Monger at Telethon Speech and Hearing, 36 Dodd St, Wembley (please see map attached for directions).

Please arrive at 8:30am (for a 9:00am start). The forum is scheduled to conclude at 5:30pm, at which time you will receive payment of \$150 for your attendance (those travelling from the country will receive additional payments to assist with meeting their costs).

In preparation for your attendance I have enclosed the following:

- Participant Information Sheet (*yours to keep*)
- Form of Consent (*to be completed and returned*)
- Dietary Requirements and Emergency Contact form (*to be completed and returned*)
- Reply paid envelope
- Map of the venue (*yours to keep*)

### **Providing Consent to Participate**

The Participant Information Sheet is yours to keep. It is important that you understand this form and the Community Forum Coordinator (the Coordinator) will call you soon to talk you through its contents. Once you have advised the Coordinator that you have understood the information and you have had any questions answered, you will be asked to fill in your name, sign, date (and return the Form of Consent. The red tabs on the form show the sections you need to complete.

**You will need to send this back before we can confirm your attendance at the forum.**

Signed and completed Forms of Consent may be sent in the reply paid envelope provided or they can be scanned and emailed to: [FHscreening@health.wa.gov.au](mailto:FHscreening@health.wa.gov.au)

If you sign the Form of Consent and return it before the Coordinator has spoken to you that is fine. You will still receive a call to confirm that you have understood the Information Sheet, as it is essential for this process to occur.

## Completing the Dietary Requirements and Emergency Contact form

It will also be helpful if you are able to advise of any dietary requirements you may have and to provide the details of an emergency contact. Please complete this form and send it along with the signed Form of Consent.

## What to bring on the day of the forum

1. Once your documents have been received, you will be mailed out an **FH Information Booklet**. This booklet explains some of the issues that are going to be discussed on the day and will help you to prepare for the forum. Please bring this along on the day of the forum.
2. Reading glasses if you require them.

Notepads and pens will be provided as you will be encouraged to take notes throughout the day. Coffee and tea will be available between 8:30am and 9:00am. Morning tea, lunch and afternoon tea will also be provided.

Thanks again for your participation and if you have any questions at any stage, or if you are no longer able to attend, please contact the Coordinator, Alicia Bauskis, at [FHscreening@health.wa.gov.au](mailto:FHscreening@health.wa.gov.au) or (08) 9222 6809.

I look forward to meeting you on the day.

Yours sincerely,



Dr Andrew Martin  
Principal Study Investigator  
Princess Margaret Hospital
